# Supplementary material for: Guaiacol hydrodeoxygenation reaction catalyzed by highly dispersed, single layered MoS2/C
Source: Royal Society of Chemistry journal article supplement (doi:10.1039/c5cy00607d), 2015-01-01
Supplement: c5cy00607d1.pdf [file c5cy00607d1.pdf]

# Guaiacol hydrodeoxygenation reaction catalyzed by highly dispersed, single layered MoS<sub>2</sub>/C

Swathi Mukundan,<sup>a</sup> Muxina Konarova,<sup>a</sup> Luqman Atanda,<sup>a</sup> Qing Ma,<sup>a</sup> and Jorge Beltramini\*<sup>a</sup>

<sup>a</sup> Nanomaterials center- AIBN and school of chemical engineering, The University of Queensland, Brisbane, QLD-4072, Australia

## List of contents:

## Figures:

**Fig. 1** Temperature programmed reduction (TPR) profile of Fresh MoS<sub>2</sub>/C catalyst

**Fig. 2** Curve fitting spectra of (a) Mo 3d region (b) S 2p region of MoS<sub>2</sub>/C catalyst before and after reduction

**Fig. 3** Catalyst reusability study. Conversion and selectivity of products for HDO of guaiacol over MoS<sub>2</sub>/C catalyst

**Fig. 4** EDX spectrum of MoS<sub>2</sub>/C- fresh at three different spots

**Fig. 5** EDX spectrum of MoS<sub>2</sub>/C- cycle 4 catalyst at three different spots

**Fig. 6** Survey scan XP spectrum of MoS<sub>2</sub>/C- fresh catalyst. CPS= counts s<sup>-1</sup>

## Tables:

**Table 1.** Summary of the E<sub>1/2g</sub> and A<sub>1g</sub> peak frequencies of fresh MoS<sub>2</sub>/C and used catalysts

**Table 2.** XPS binding energy values (eV) of Mo 3d and S 2p components of fresh and used MoS<sub>2</sub>/C catalysts at various oxidation states

During the catalyst synthesis, a certain amount of  $\text{SO}_2$  is formed due to presence of atmospheric oxygen. These  $\text{SO}_2$  can be removed upon reducing the catalyst in the presence of  $\text{H}_2$  at  $450^\circ\text{C}$  for 3 hours. TPR analysis (Fig. 1) shows that  $\text{SO}_2$  starts being released at the room temperature in the presence of  $\text{H}_2$  and completely removed at  $450^\circ\text{C}$ . The catalyst after being heat treated in the presence of  $\text{H}_2$  has no or negligible  $\text{SO}_2$  which is also confirmed by XPS (Fig. 2). Molybdenum oxide reduces to Mo metal at high temperature of about  $800^\circ\text{C}$ . There is no  $\text{H}_2\text{S}$  gas released which means the S atom attached to Mo atoms is very stable and it does not react with  $\text{H}_2$  to give  $\text{H}_2\text{S}$ . No change was observed for the oxidation state of Mo.

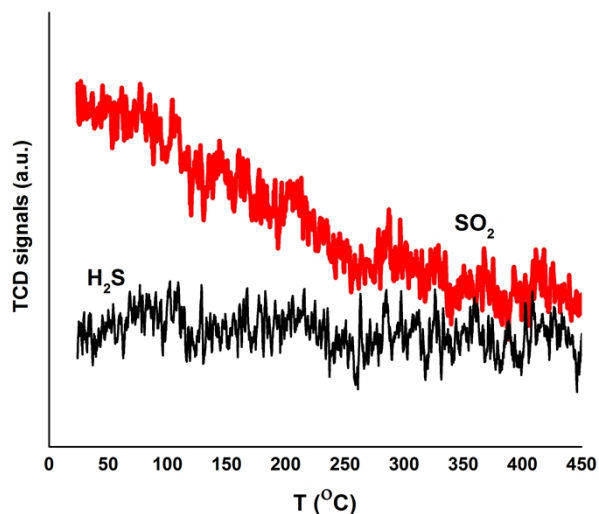

Fig. 1 Temperature programmed reduction (TPR) profile of Fresh  $\text{MoS}_2/\text{C}$  catalyst

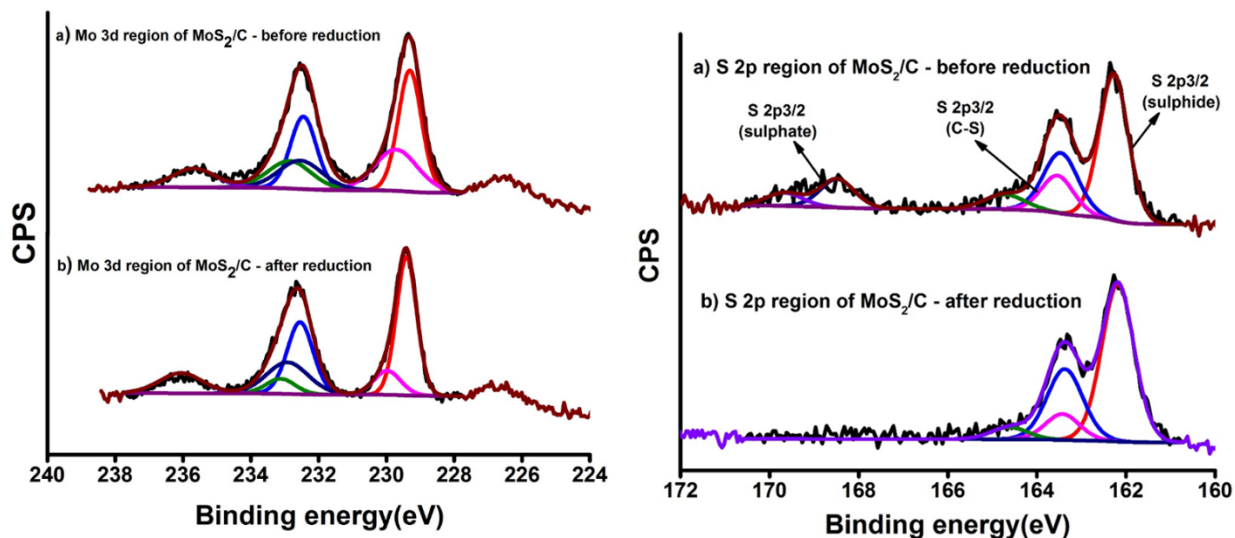

Fig. 2 Curve fitting spectra of (a) Mo 3d region (b) S 2p region of  $\text{MoS}_2/\text{C}$  catalyst before and after reduction

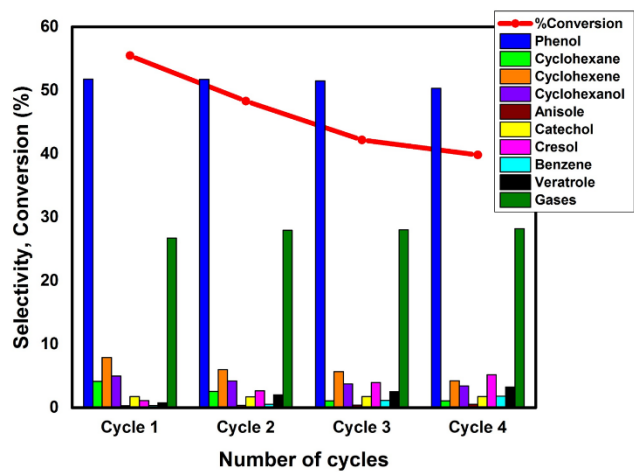

Fig. 3 Catalyst reusability study. Conversion and selectivity of products for HDO of guaiacol over MoS<sub>2</sub>/C catalyst

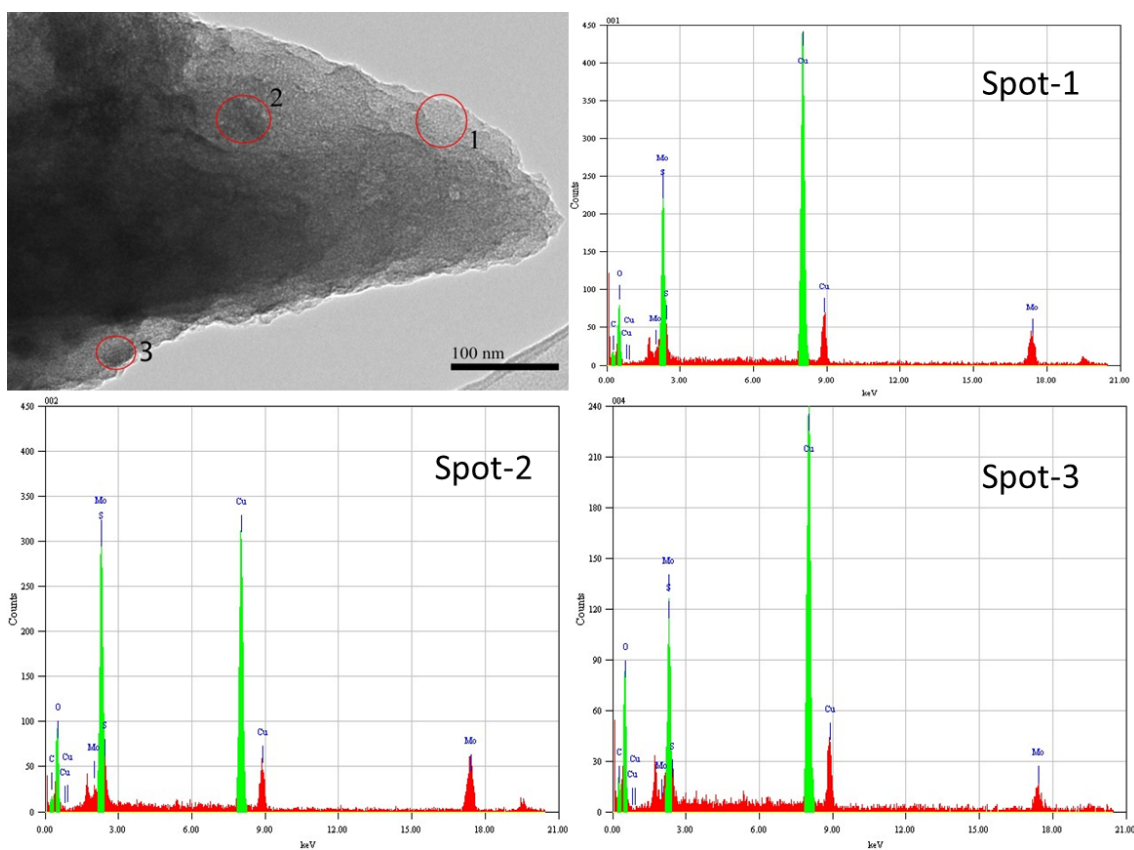

Fig. 4 EDX spectrum of MoS<sub>2</sub>/C- fresh at three different spots

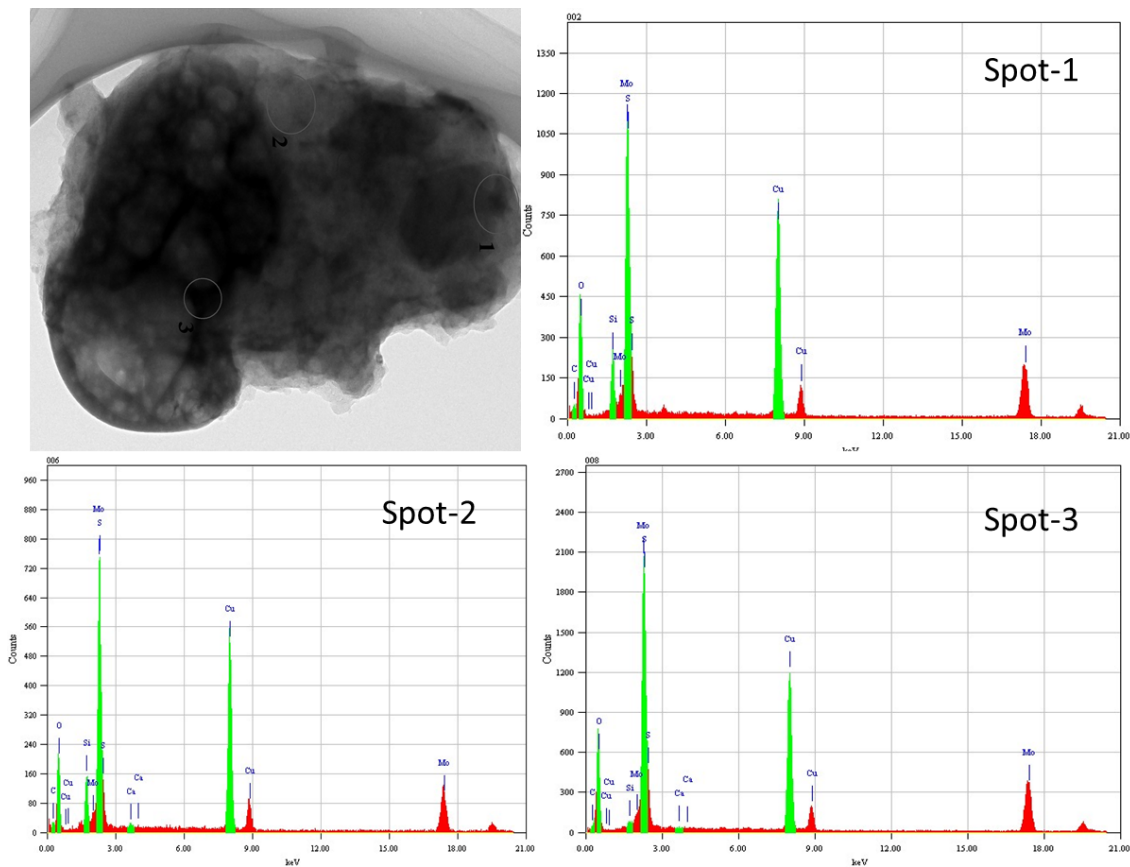

Fig. 5 EDX spectrum of MoS<sub>2</sub>/C- cycle 4 catalyst at three different spots

The oxidation state and composition of the elements at the outer surface level of the fresh and used MoS<sub>2</sub>/C catalysts were analyzed by XPS. C1s at 284.6eV was used as the reference for interpreting the binding energy of other elements. The general survey scan spectra (Fig. 5) confirms the presence of C, O, Mo and S in the catalyst. C and O were found to be the major components along with Mo and S.

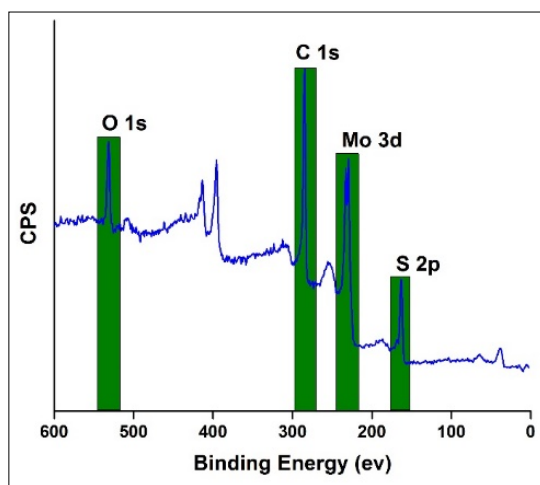

Fig. 6 Survey scan XPS spectrum of MoS<sub>2</sub>/C- fresh catalyst. CPS= counts s<sup>-1</sup>

**Table 1.** Summary of the  $E_{2g}^1$  and  $A_{1g}$  peak frequencies of fresh  $\text{MoS}_2/\text{C}$  and used catalysts

| Catalyst                        | $E_{2g}^1$ peak frequency (cm <sup>-1</sup> ) | $A_{1g}$ peak frequency (cm <sup>-1</sup> ) |
|---------------------------------|-----------------------------------------------|---------------------------------------------|
| $\text{MoS}_2/\text{C}$ - fresh | 383.92                                        | 403.66                                      |
| Cycle 1                         | 383.26                                        | 403.99                                      |
| Cycle 2                         | 382.93                                        | 406.35                                      |
| Cycle 3                         | 381.23                                        | 405.36                                      |
| Cycle 4                         | 384.96                                        | 407.39                                      |

| Catalyst<br>$\text{MoS}_2/\text{C}$ | Binding energy (eV)   |                       |                 |                 |               |
|-------------------------------------|-----------------------|-----------------------|-----------------|-----------------|---------------|
|                                     | Mo (+4)<br>$3d_{5/2}$ | Mo (+6)<br>$3d_{5/2}$ | S<br>$2p_{1/2}$ | S<br>$2p_{3/2}$ | $\text{SO}_2$ |
| Fresh                               | 229.4                 | 232.6                 | 162.3           | 164.6           | 169.8         |
| Cycle 1                             | 229.4                 | 232.6                 | 162.3           | 164.6           | 169.4         |
| Cycle 2                             | 229.4                 | 232.6                 | 162.3           | 164.6           | 169.7         |
| Cycle 3                             | 229.4                 | 232.6                 | 162.3           | 164.6           | 169.7         |
| Cycle 4                             | 229.4                 | 232.6                 | 162.3           | 164.6           | 169.3         |

**Table 2.** XPS binding energy values (eV) of Mo 3d and S 2p components of fresh and used  $\text{MoS}_2/\text{C}$  catalysts at various oxidation states
